# Supplementary material
Source: PubMed Central journal article supplement (PMC2640959)

**FIGURE S1. Inclusion bodies are ubiquitinated and co-localized with proteasomes.** (A) Striatal neurons were transfected with CFP-htt (middle panel), LMP2-YFP (proteasome subunit) (left panel), fixed after 48 h, and stained with an antibody against ubiquitin (right panel). (B) Colocalization of CFPhtt fluorescence with ubiquitin staining and with proteasomes indicated by LMP2-YFP fluorescence. Colocalization for IBs/ubiquitin: 92.7% $\pm$ 7.6; for IBs/proteasomes 73.8% $\pm$ 15.8. The bar is 50  $\mu$ m.

Figure S1

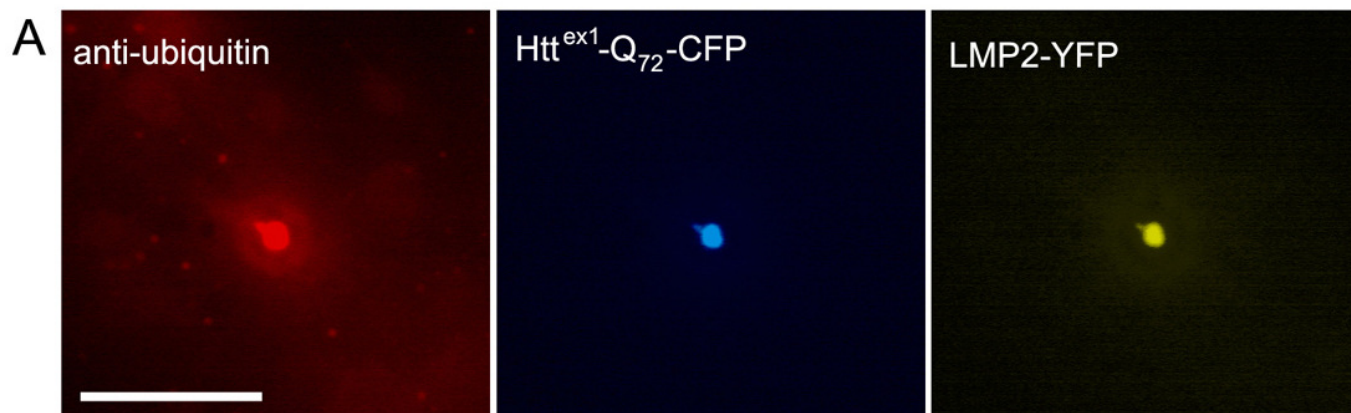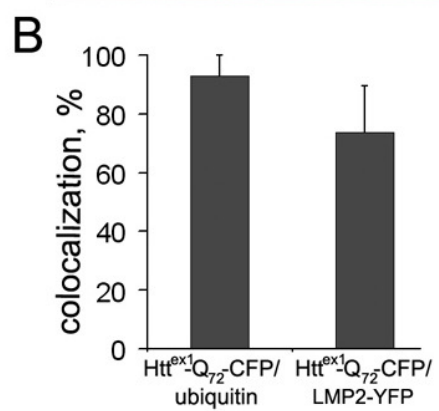

Supplement: M806269200_1.pdf [file M806269200_1.pdf]
